# Supplementary material for: Characterizing Circulating Nucleosomes in the Plasma of Dogs with Lymphoma
Source: Research Square preprint supplement (doi:10.21203/rs.3.rs-318227/v1), 2021-03-24
Supplement: Supplementary file 1 [file 60a29f9054f95aa309254901.pdf]

**Table 1:** Spearman correlation coefficients for H3.1 nucleosome concentrations, CRP, and TK.

|      | H3.1   | CRP    | TK     |
|------|--------|--------|--------|
| H3.1 | 100.0% | -1.5%  | -11.5% |
| CRP  | -1.5%  | 100.0% | -27.7% |
| TK   | -11.5% | -27.7% | 100.0% |
